# Supplementary material
Source: MDPI journal article supplement (https://www.mdpi.com/2227-9091/7/4/101)
Supplement: s1 [file s1]

**Supplementary Material for: Table S1.** The Value of Consensus, Lambda, and CR.

| Group                     | Level | Criteria      | Consensus | Lambda | CR   |
|---------------------------|-------|---------------|-----------|--------|------|
| Local Weights             | 1     | Overall       | 54.9%     | 3.000  | 0.0% |
|                           | 2     | Domestic      | 69.9%     | 5.035  | 0.8% |
|                           | 2     | International | 65.9%     | 5.014  | 0.3% |
|                           | 2     | Risk          | 75.5%     | 5.016  | 0.4% |
| Local Weights for Group 1 | 1     | Overall       | 58.8%     | 3.000  | 0.0% |
|                           | 2     | Domestic      | 63.5%     | 5.070  | 1.6% |
|                           | 2     | International | 64.4%     | 5.072  | 1.6% |
|                           | 2     | Risk          | 85.0%     | 5.024  | 0.5% |
| Local Weights for Group 2 | 1     | Overall       | 56.0%     | 3.011  | 1.2% |
|                           | 2     | Domestic      | 88.4%     | 5.059  | 1.3% |
|                           | 2     | International | 71.8%     | 5.037  | 0.8% |
|                           | 2     | Risk          | 72.1%     | 5.071  | 1.6% |
